# Supplementary material for: The Yellow Gorgonian Eunicella cavolini: Demography and Disturbance Levels across the Mediterranean Sea
Source: PubMed Central journal article supplement (PMC4420262; doi:10.1371/journal.pone.0126253), 2015-05-05
Supplement: pone.0126253.s001.pdf [file pone.0126253.s001.pdf]

**S1 File. Pairwise comparisons of *Eunicella cavolini* population density and colony height at different sites.**

**Table A: Pairwise comparisons of *Eunicella cavolini* population density between different sites.**

| Density          |            |                            |         |         |              |
|------------------|------------|----------------------------|---------|---------|--------------|
| Region           | Locality   | Sites                      | t       | p-value | Unique perms |
| NW Mediterranean | Marseille  | Jarre, Castelvieuille      | 8.2771  | 0.0001* | 9234         |
|                  |            | Jarre, Pharillons          | 8.491   | 0.0001* | 8969         |
|                  |            | Castelvieuille, Pharillons | 1.0518  | 0.3025  | 2836         |
| NW Mediterranean | Scandola   | Palazzinu, Gargallu        | 0.82342 | 0.4139  | 9815         |
|                  |            | Palazzinu, Imbuttu         | 0.4661  | 0.6432  | 9811         |
|                  |            | Gargallu, Imbuttu          | 0.36442 | 0.7144  | 9831         |
| CE Adriatic      | Kornati    | Obrucan, Balun             | 1.1748  | 0.241   | 9834         |
|                  |            | Obrucan, Mana              | 1.4715  | 0.1461  | 9793         |
|                  |            | Balun, Mana                | 2.5824  | 0.0124* | 9806         |
| CE Adriatic      | Rogoznica  | Smokvica, Planka           | 0.12852 | 0.8986  | 8611         |
| N Aegean         | Pelio      | Ag. Vasso, Lefteris        | 0.99359 | 0.3308  | 6946         |
| N Aegean         | Chalkidiki | Ambelos, Nemesis           | 4.7324  | 0.0001* | 5087         |
|                  |            | Ambelos, Spilia            | 7.6613  | 0.0001* | 3348         |
|                  |            | Nemesis, Spilia            | 1.8253  | 0.0688  | 6718         |
| N Aegean         | Lesvos     | Palios, Kalloni            | 4.9877  | 0.0001* | 6517         |

\*statistically significant difference ( $p < 0.05$ ).

**Table B: Pairwise comparisons of *Eunicella cavolini* colony height between different sites.**

| Height           |            |                            |        |         |              |
|------------------|------------|----------------------------|--------|---------|--------------|
| Region           | Locality   | Sites                      | t      | p-value | Unique perms |
| NW Mediterranean | Marseille  | Jarre, Castelvieuille      | 5.5745 | 0.0001* | 9815         |
|                  |            | Jarre, Pharillons          | 1.8146 | 0.0712  | 9822         |
|                  |            | Castelvieuille, Pharillons | 2.5223 | 0.0126* | 9846         |
| NW Mediterranean | Scandola   | Imbuttu, Palazzinu         | 3.2787 | 0.0012* | 9825         |
|                  |            | Imbuttu, Gargallu          | 2.7148 | 0.0074* | 9836         |
|                  |            | Palazzinu, Gargallu        | 5.6487 | 0.0001* | 9844         |
| CE Adriatic      | Kornati    | Mana, Balun                | 1.4603 | 0.1468  | 9824         |
|                  |            | Mana, Obrucan              | 7.3821 | 0.0001* | 9824         |
|                  |            | Balun, Obrucan             | 7.4461 | 0.0001* | 9835         |
| CE Adriatic      | Rogoznica  | Smokvica, Planka           | 3.1893 | 0.0018* | 9848         |
| N Aegean         | Pelio      | Ag. Vasso, Lefteris        | 4.1543 | 0.0001* | 9831         |
| N Aegean         | Chalkidiki | Ambelos, Nemesis           | 10.24  | 0.0001* | 9844         |
|                  |            | Ambelos, Spilia            | 1.7248 | 0.0914  | 9822         |
|                  |            | Nemesis, Spilia            | 7.0881 | 0.0001* | 9842         |
| N Aegean         | Lesvos     | Palios, Kalloni            | 5.299  | 0.0001* | 9821         |

\*statistically significant differences ( $p < 0.05$ ).
